# Supplementary material for: PD-L1+ and XCR1+ dendritic cells are region-specific regulators of gut homeostasis
Source: PubMed Central journal article supplement (PMC8363668; doi:10.1038/s41467-021-25115-3), 2021-08-13
Supplement: 41467_2021_25115_MOESM9_ESM.pdf [file 41467_2021_25115_MOESM9_ESM.pdf]

Supplementary Table 6: Donor Information

| <b>Patient ID</b> | <b>Age</b> | <b>Gender</b> | <b>CHC</b>   |
|-------------------|------------|---------------|--------------|
| P1                | 58         | Male          | not present  |
| P2                | 50         | Female        | Hypertension |
| P3                | 55         | Male          | not present  |
| P4                | 59         | Male          | not present  |
| P6                | 57         | Female        | not present  |
| P7                | 66         | Male          | not present  |
| P8                | 62         | Male          | Hypertension |
| P9                | 54         | Male          | Hypertension |
| P10               | 55         | Male          | not present  |
| P11               | 53         | Female        | not present  |

CHC= Chronic health condition
